# Supplementary material for: Perceptions on the Psychological Impact of Facial Erythema Associated with Rosacea: Results of International Survey
Source: PubMed Central journal article supplement — Dermatol Ther (Heidelb). 2015 May 29;5(2):117–27. doi: 10.1007/s13555-015-0077-2 (PMC4470961; doi:10.1007/s13555-015-0077-2), 2015-05-29
Supplement: 13555_2015_77_MOESM2_ESM.pdf [file 13555_2015_77_MOESM2_ESM.pdf]

- As a common symptom of rosacea, redness (facial erythema) is frequently considered only a cosmetic problem yet it also negatively impacts psychological and emotional health.
- How we form opinions of others is often based on our initial subconscious perceptions of appearance, so what does this mean for people with facial erythema?
- We examined how the lives of people with facial erythema of rosacea are affected by the condition, and how other people perceive them.
- The survey results showed that people with facial erythema of rosacea may be disadvantaged based on first impressions at work, socially, and in their relationships owing to the appearance of their skin.
- More needs to be done to treat those with facial erythema of rosacea from both a physiological and psychosocial perspective - treating not only the physical symptoms, but also the person experiencing the symptoms.

This summary slide represents the opinions of the authors. Sponsorship for this study was funded by Galderma. Medical writing assistance for this study was provided by Jeremy Bray, independent medical writer and supported by Ogilvy Healthworld. For a full list of acknowledgments and conflicts of interest for all authors of this article, please see the full text online. Copyright © The Authors 2015. Creative Commons Attribution Noncommercial License (CC BY-NC).
